# Supplementary material for: Calcification depth of deep-dwelling planktonic foraminifera from the eastern North Atlantic constrained by stable oxygen isotope ratios of shells from stratified plankton tows
Source: Copernicus journal article supplement (doi:10.5194/jm-38-113-2019), 2019-07-12
Supplement: Supplementary file 1 [file jm-38-113-2019-supplement.zip]

Archive with 2 entries (2 files):
- Table to supplement.xlsx
- jm-38-113-2019-supplement-title-page.pdf
