# Supplementary material for: Calcification depth of deep-dwelling planktonic foraminifera from the eastern North Atlantic constrained by stable oxygen isotope ratios of shells from stratified plankton tows
Source: Copernicus journal article supplement (doi:10.5194/jm-38-113-2019), 2019-07-12
Supplement: Supplementary file 1 [file jm-38-113-2019-supplement.zip › jm-38-113-2019-supplement-title-page.pdf]

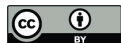

*Supplement of*

**Calcification depth of deep-dwelling planktonic foraminifera from the eastern North Atlantic constrained by stable oxygen isotope ratios of shells from stratified plankton tows**

**Andreia Rebotim et al.**

*Correspondence to:* Andreia Rebotim ([andreia.rebotim@ipma.pt](mailto:andreia.rebotim@ipma.pt))

- [jm-38-113-2019-supplement-title-page.pdf](#)
- [Table to supplement.xlsx](#)

The copyright of individual parts of the supplement might differ from the CC BY 4.0 License.
