# Supplementary material for: Calcification depth of deep-dwelling planktonic foraminifera from the eastern North Atlantic constrained by stable oxygen isotope ratios of shells from stratified plankton tows
Source: Copernicus journal article supplement (doi:10.5194/jm-38-113-2019), 2019-07-12
Supplement: Supplementary file 1 [file Table to supplement.xlsx]

## Sheet: Folha1
stationID	species	N. of specimens	cytoplasm	crust	depth_min	depth_max	depth_avg	size_min	size_max	d18O
POS383_161	G_hirsuta	5	Y	Y	200	300	250	300	>300	0.636082
POS383_161	G_hirsuta	1	Y	Y	300	500	400	300	>300	0.921397
POS383_161	G_hirsuta	1	Y	Y	300	500	400	300	>300	0.801391
POS383_161	G_hirsuta	1	Y	Y	500	700	600	300	>300	1.13796
POS383_161	G_hirsuta	1	N	Y	500	700	600	300	>300	1.15119
POS383_161	G_hirsuta	1	Y	Y	100	200	150	300	>300	1.21636
POS383_161	G_hirsuta	3	Y	Y	100	200	150	250	300	0.628033
POS383_161	G_hirsuta	3	Y	Y	100	200	150	250	300	0.638933
POS383_161	G_hirsuta	2	Y	Y	200	300	250	250	300	0.765065
POS383_161	G_hirsuta	2	Y	Y	300	500	400	250	300	0.751224
POS383_161	G_hirsuta	2	Y	Y	300	500	400	250	300	0.670725
POS383_161	G_hirsuta	2	Y	Y	500	700	600	250	300	0.839364
POS383_161	G_hirsuta	2	Y	Y	0	100	50	250	300	0.600822
POS383_161	G_hirsuta	4	Y	Y	100	200	150	150	250	0.574994
POS383_161	G_inflata	1	Y	Y	200	300	250	300	>300	1.09578
POS383_161	G_inflata	4	Y	Y	0	100	50	250	300	0.512702
POS383_161	G_inflata	3	Y	Y	100	200	150	250	300	0.579689
POS383_161	G_inflata	2	Y	Y	200	300	250	250	300	0.502812
POS383_161	G_inflata	3	Y	N	200	300	250	250	300	0.627383
POS383_161	G_inflata	7	Y	Y	0	100	50	150	250	1.18019
POS383_161	G_scitula	26	Y	Y	100	200	150	150	250	0.350152
POS383_161	G_scitula	15	Y	Y	200	300	250	150	250	0.367909
POS383_161	G_scitula	20	Y	Y	300	500	400	150	250	0.617443
POS383_161	G_scitula	21	Y	Y	300	500	400	150	250	0.577549
POS383_161	G_scitula	20	Y	Y	500	700	600	150	250	0.447031
POS383_161	G_truncatulinoides	1	Y	Y	0	100	50	300	>300	0.279051
POS383_161	G_truncatulinoides	1	Y	Y	200	300	250	300	>300	0.813309
POS383_161	G_truncatulinoides	1	Y	Y	300	500	400	300	>300	0.907176
POS383_161	G_truncatulinoides	1	Y	Y	300	500	400	300	>300	1.14305
POS383_161	G_truncatulinoides	1	N	Y	500	700	600	300	>300	1.12484
POS383_161	G_truncatulinoides	3	Y	Y	0	100	50	250	300	0.595209
POS383_161	G_truncatulinoides	2	Y	Y	0	100	50	250	300	0.544902
POS383_161	G_truncatulinoides	3	Y	Y	0	100	50	250	300	0.504756
POS383_161	G_truncatulinoides	2	Y	Y	100	200	150	250	300	0.677001
POS383_161	G_truncatulinoides	3	Y	Y	100	200	150	250	300	0.661563
POS383_161	G_truncatulinoides	2	Y	Y	500	700	600	250	300	1.11243
POS383_161	G_truncatulinoides	3	Y	Y	200	300	250	250	300	0.708722
POS383_161	G_truncatulinoides	2	Y	Y	200	300	250	250	300	0.911179
POS383_161	G_truncatulinoides	2	Y	Y	300	500	400	250	300	1.14354
POS383_161	G_truncatulinoides	9	Y	N	0	100	50	150	250	0.284987
POS383_163	G_hirsuta	1	Y	Y	300	500	400	300	>300	0.639573
POS383_163	G_hirsuta	1	Y	Y	300	500	400	300	>300	0.729904
POS383_163	G_hirsuta	4	Y	N	300	500	400	300	>300	0.909802
POS383_163	G_hirsuta	1	Y	Y	200	300	250	300	>300	0.672005
POS383_163	G_hirsuta	1	Y	N	200	300	250	300	>300	0.837731
POS383_163	G_hirsuta	1	Y	Y	500	700	600	300	>300	0.947142
POS383_163	G_hirsuta	1	Y	Y	500	700	600	300	>300	0.909412
POS383_163	G_hirsuta	2	Y	Y	500	700	600	300	>300	0.988179
POS383_163	G_hirsuta	3	Y	Y	300	500	400	250	300	0.856087
POS383_163	G_hirsuta	5	Y	Y	500	700	600	250	300	0.786751
POS383_163	G_hirsuta	3	Y	Y	100	200	150	250	300	0.506182
POS383_163	G_hirsuta	4	Y	Y	100	200	150	250	300	0.581174
POS383_163	G_hirsuta	4	Y	Y	200	300	250	250	300	0.604605
POS383_163	G_hirsuta	6	Y	Y	200	300	250	250	300	0.677452
POS383_163	G_hirsuta	5	Y	Y	0	100	50	150	300	0.394091
POS383_163	G_inflata	2	Y	Y	100	200	150	300	>300	0.424159
POS383_163	G_inflata	4	Y	Y	100	200	150	250	300	0.565355
POS383_163	G_inflata	5	Y	Y	200	300	250	250	300	0.379589
POS383_163	G_inflata	3	Y	Y	300	500	400	250	300	0.846266
POS383_163	G_inflata	5	Y	Y	0	100	50	150	300	0.354145
POS383_163	G_scitula	25	Y	Y	200	300	250	150	250	0.45991
POS383_163	G_scitula	26	Y	Y	200	300	250	150	250	0.288438
POS383_163	G_scitula	25	Y	Y	300	500	400	150	250	0.482889
POS383_163	G_scitula	25	Y	Y	300	500	400	150	250	0.35986
POS383_163	G_scitula	25	Y	Y	500	700	600	150	250	0.517522
POS383_163	G_scitula	25	Y	Y	500	700	600	150	250	0.635603
POS383_163	G_truncatulinoides	1	Y	Y	300	500	400	300	>300	1.10408
POS383_163	G_truncatulinoides	1	Y	Y	200	300	250	300	>300	0.740754
POS383_163	G_truncatulinoides	1	Y	Y	0	100	50	300	>300	0.549587
POS383_163	G_truncatulinoides	1	Y	Y	300	500	400	250	300	1.21224
POS383_163	G_truncatulinoides	3	Y	N	300	500	400	250	300	0.844205
POS383_163	G_truncatulinoides	3	Y	N	300	500	400	250	300	1.00876
POS383_163	G_truncatulinoides	3	Y	Y	500	700	600	250	300	1.24363
POS383_163	G_truncatulinoides	2	Y	Y	0	100	50	250	300	0.772652
POS383_163	G_truncatulinoides	3	Y	Y	100	200	150	250	300	0.590595
POS383_163	G_truncatulinoides	4	Y	Y	200	300	250	250	300	0.703842
POS383_163	G_truncatulinoides	3	Y	Y	200	300	250	250	300	0.694872
POS383_163	G_truncatulinoides	8	Y	Y	0	100	50	150	300	0.384612
POS383_165	G_hirsuta	1	Y	Y	300	500	400	300	>300	0.882415
POS383_165	G_hirsuta	1	Y	Y	300	500	400	300	>300	1.04774
POS383_165	G_hirsuta	1	Y	Y	500	700	600	300	>300	1.15588
POS383_165	G_hirsuta	1	Y	Y	500	700	600	300	>300	0.851534
POS383_165	G_hirsuta	3	Y	Y	100	200	150	250	300	0.673825
POS383_165	G_hirsuta	3	Y	Y	100	200	150	250	300	0.729581
POS383_165	G_hirsuta	9	Y	Y	100	200	150	250	300	0.416975
POS383_165	G_hirsuta	2	Y	Y	200	300	250	250	300	0.620002
POS383_165	G_hirsuta	3	Y	Y	200	300	250	250	300	0.603113
POS383_165	G_hirsuta	3	Y	Y	300	500	400	250	300	0.991016
POS383_165	G_hirsuta	3	Y	Y	300	500	400	250	300	0.769175
POS383_165	G_hirsuta	2	Y	Y	500	700	600	250	300	0.650361
POS383_165	G_hirsuta	3	Y	Y	500	700	600	250	300	0.594374
POS383_165	G_inflata	4	Y	Y	100	200	150	250	300	0.634523
POS383_165	G_inflata	3	Y	Y	200	300	250	250	300	0.574347
POS383_165	G_inflata	2	Y	Y	300	500	400	250	300	0.58066
POS383_165	G_inflata	8	Y	Y	0	100	50	150	300	0.505457
POS383_165	G_scitula	25	Y	Y	100	200	150	150	250	0.287828
POS383_165	G_scitula	25	Y	Y	200	300	250	150	250	0.265888
POS383_165	G_scitula	25	Y	Y	200	300	250	150	250	0.399921
POS383_165	G_scitula	25	Y	Y	300	500	400	150	250	0.572812
POS383_165	G_scitula	26	Y	Y	300	500	400	150	250	0.316834
POS383_165	G_scitula	25	Y	Y	500	700	600	150	250	0.678215
POS383_165	G_scitula	30	Y	Y	500	700	600	150	250	0.541325
POS383_165	G_truncatulinoides	1	Y	Y	200	300	250	300	>300	0.916822
POS383_165	G_truncatulinoides	2	Y	Y	100	200	150	250	300	0.824637
POS383_165	G_truncatulinoides	2	Y	N	100	200	150	250	300	0.683007
POS383_165	G_truncatulinoides	4	Y	N	100	200	150	250	300	0.599835
POS383_165	G_truncatulinoides	4	Y	N	100	200	150	250	300	0.424137
POS383_165	G_truncatulinoides	3	Y	Y	200	300	250	250	300	0.721156
POS383_165	G_truncatulinoides	2	Y	Y	300	500	400	250	300	1.07999
POS383_165	G_truncatulinoides	2	Y	Y	300	500	400	250	300	1.02381
POS383_165	G_truncatulinoides	6	Y	Y	0	100	50	150	300	0.438622
POS383_173	G_hirsuta	1	Y	Y	500	700	600	300	>300	0.644975
POS383_173	G_hirsuta	3	Y	Y	300	500	400	250	300	0.633688
POS383_173	G_hirsuta	3	Y	Y	500	700	600	250	300	1.00541
POS383_173	G_hirsuta	5	Y	Y	100	200	150	250	>300	0.483282
POS383_173	G_hirsuta	6	Y	Y	300	500	400	150	300	0.496305
POS383_173	G_hirsuta	5	Y	Y	0	100	50	150	>300	0.00743522
POS383_173	G_inflata	5	Y	Y	0	100	50	150	300	0.188596
POS383_173	G_scitula	25	Y	Y	300	500	400	150	250	0.304392
POS383_173	G_scitula	20	Y	Y	300	500	400	150	250	0.246446
POS383_173	G_scitula	25	Y	Y	300	500	400	150	250	-0.100023
POS383_173	G_truncatulinoides	4	Y	Y	100	200	150	300	>300	0.627805
POS383_173	G_truncatulinoides	2	Y	Y	300	500	400	300	>300	0.780345
POS383_173	G_truncatulinoides	4	Y	Y	0	100	50	250	300	0.452029
POS383_173	G_truncatulinoides	4	Y	Y	300	500	400	250	300	0.515416
POS383_175	G_hirsuta	1	Y	Y	200	300	250	300	>300	0.560027
POS383_175	G_hirsuta	1	Y	Y	300	500	400	300	>300	0.834916
POS383_175	G_hirsuta	3	Y	Y	100	200	150	250	300	0.000614598
POS383_175	G_hirsuta	5	Y	Y	200	300	250	250	300	0.404309
POS383_175	G_hirsuta	4	Y	Y	300	500	400	250	300	0.519476
POS383_175	G_hirsuta	6	Y	Y	500	700	600	250	300	0.664404
POS383_175	G_hirsuta	6	Y	Y	500	700	600	250	300	0.635301
POS383_175	G_hirsuta	3	Y	Y	0	100	50	250	>300	0.654088
POS383_175	G_inflata	4	Y	Y	300	500	400	250	300	0.653015
POS383_175	G_inflata	7	Y	Y	0	100	50	150	300	0.304531
POS383_175	G_inflata	3	Y	Y	200	300	250	250	>300	0.454941
POS383_175	G_scitula	25	Y	Y	300	500	400	150	250	-0.299555
POS383_175	G_scitula	25	Y	Y	500	700	600	150	250	0.467091
POS383_175	G_truncatulinoides	3	Y	Y	200	300	250	300	>300	0.544254
POS383_175	G_truncatulinoides	1	Y	Y	300	500	400	300	>300	1.11521
POS383_175	G_truncatulinoides	3	Y	Y	0	100	50	300	>300	0.211323
POS383_175	G_truncatulinoides	3	Y	Y	500	700	600	300	>300	1.13941
POS383_175	G_truncatulinoides	4	Y	Y	100	200	150	250	>300	0.525671
POS383_175	G_truncatulinoides	7	Y	Y	0	100	50	250	300	0.425013
POS383_175	G_truncatulinoides	3	Y	Y	300	500	400	250	300	0.571852
POS384_210	G_inflata	5	Y	Y	0	100	50	250	300	0.589568
POS384_273	G_inflata	3	Y	Y	200	300	250	250	300	1.04312
POS384_273	G_inflata	4	Y	Y	300	500	400	250	300	1.02288
Ib-F_2	G_inflata	5	Y	Y	80	200	140	250	300	0.285167
Ib-F_2	G_inflata	3	Y	Y	200	300	250	250	300	0.243519
Ib-F_2	G_inflata	10	Y	Y	80	200	140	150	250	0.19621
Ib-F_2	G_scitula	15	Y	Y	200	300	250	150	250	-0.889054
Ib-F_6	G_inflata	4	Y	Y	0	70	35	250	300	0.440338
Ib-F_6	G_inflata	5	Y	Y	70	140	105	250	300	0.729935
Ib-F_6	G_inflata	5	Y	Y	0	70	35	250	>300	0.544785
Ib-F_6	G_inflata	5	Y	M	140	540	340	250	>300	0.826052
Ib-F_8	G_inflata	2	Y	Y	120	240	180	250	300	0.917924
Ib-F_8	G_inflata	3	Y	Y	240	400	320	250	300	1.0141
Ib-F_8	G_inflata	5	Y	Y	0	60	30	150	300	0.599677
Ib-F_9	G_inflata	3	Y	Y	0	90	45	250	300	0.530663
Ib-F_12	G_inflata	1	Y	Y	200	350	275	300	>300	1.52778
Ib-F_12	G_inflata	5	Y	Y	0	100	50	250	300	0.530956
Ib-F_12	G_inflata	5	Y	Y	0	100	50	250	300	0.597612
Ib-F_12	G_inflata	2	Y	Y	100	200	150	250	300	1.03655
Ib-F_12	G_inflata	3	Y	Y	100	200	150	250	300	0.735195
Ib-F_12	G_inflata	3	Y	Y	100	200	150	250	300	0.866347
Ib-F_12	G_inflata	2	Y	Y	200	350	275	250	300	0.967046
Ib-F_12	G_inflata	3	Y	N	200	350	275	250	300	0.924029
POS349_251	G_hirsuta	6	Y	NA	0	100	50	150	NA	0.378
POS349_251	G_hirsuta	6	Y	NA	0	100	50	150	NA	0.412
POS349_251	G_hirsuta	3	Y	NA	100	200	150	150	NA	0.47895
POS349_251	G_hirsuta	3	Y	NA	100	200	150	150	NA	0.5215
POS349_251	G_hirsuta	3	Y	NA	100	200	150	150	NA	0.51775
POS349_251	G_hirsuta	3	Y	NA	100	200	150	150	NA	0.583
POS349_251	G_hirsuta	3	Y	NA	200	300	250	150	NA	0.504
POS349_251	G_hirsuta	3	Y	NA	200	300	250	150	NA	0.511
POS349_251	G_hirsuta	3	Y	NA	200	300	250	150	NA	0.48685
POS349_251	G_hirsuta	3	Y	NA	200	300	250	150	NA	0.737
POS349_251	G_hirsuta	3	Y	NA	300	500	400	150	NA	0.577
POS349_251	G_hirsuta	3	Y	NA	300	500	400	150	NA	0.597
POS349_251	G_hirsuta	3	Y	NA	500	700	600	150	NA	0.682
POS349_251	G_hirsuta	3	Y	NA	500	700	600	150	NA	0.798
POS349_251	G_hirsuta	3	Y	NA	500	700	600	150	NA	0.74
POS349_251	G_hirsuta	3	Y	NA	500	700	600	150	NA	0.761
POS349_251	G_inflata	8	Y	NA	0	100	50	150	NA	0.385
POS349_251	G_inflata	4	Y	NA	100	200	150	150	NA	0.6281
POS349_251	G_inflata	4	Y	NA	200	300	250	150	NA	0.567
POS349_251	G_inflata	4	Y	NA	200	300	250	150	NA	0.53305
POS349_251	G_inflata	3	Y	NA	300	500	400	150	NA	0.90765
POS349_251	G_scitula	16	Y	NA	100	200	150	150	NA	0.16975
POS349_251	G_scitula	16	Y	NA	200	300	250	150	NA	0.158
POS349_251	G_scitula	16	Y	NA	200	300	250	150	NA	0.083
POS349_251	G_scitula	15	Y	NA	500	700	600	150	NA	0.564
POS349_251	G_scitula	14	Y	NA	500	700	600	150	NA	0.515
POS349_251	G_truncatulinoides	4	Y	NA	0	100	50	150	NA	0.364
POS349_251	G_truncatulinoides	3	Y	NA	100	200	150	150	NA	0.489
POS349_251	G_truncatulinoides	3	Y	NA	100	200	150	150	NA	0.419
POS349_251	G_truncatulinoides	3	Y	NA	100	200	150	150	NA	0.525
POS349_251	G_truncatulinoides	3	Y	NA	200	300	250	150	NA	0.49
POS349_251	G_truncatulinoides	3	Y	NA	500	700	600	150	NA	0.899
POS349_251	G_truncatulinoides	3	Y	NA	500	700	600	150	NA	1.1
POS349_251	G_truncatulinoides	3	N	NA	500	700	600	150	NA	0.996
POS349_254	G_hirsuta	6	Y	NA	100	200	150	150	NA	0.372
POS349_254	G_hirsuta	6	Y	NA	100	200	150	150	NA	0.387
POS349_254	G_hirsuta	5	Y	NA	100	200	150	150	NA	0.4
POS349_254	G_hirsuta	5	Y	NA	100	200	150	150	NA	0.395
POS349_254	G_hirsuta	4	Y	NA	200	300	250	150	NA	0.619
POS349_254	G_hirsuta	4	Y	NA	200	300	250	150	NA	0.671
POS349_254	G_hirsuta	4	Y	NA	200	300	250	150	NA	0.633
POS349_254	G_hirsuta	5	Y	NA	200	300	250	150	NA	0.554
POS349_254	G_hirsuta	3	Y	NA	300	500	400	150	NA	0.712
POS349_254	G_hirsuta	4	Y	NA	300	500	400	150	NA	0.734
POS349_254	G_hirsuta	3	Y	NA	500	700	600	150	NA	0.706
POS349_254	G_hirsuta	2	Y	NA	0	100	50	150	NA	0.193
POS349_254	G_hirsuta	3	N	NA	500	700	600	150	NA	0.965
POS349_254	G_inflata	4	Y	NA	0	100	50	150	NA	0.297
POS349_254	G_inflata	5	Y	NA	100	200	150	150	NA	0.375
POS349_254	G_inflata	4	Y	NA	300	500	400	150	NA	0.618
POS349_254	G_inflata	4	Y	NA	100	700	400	150	NA	0.489
POS349_254	G_inflata	4	Y	NA	100	700	400	150	NA	0.668
POS349_254	G_inflata	4	Y	NA	100	700	400	150	NA	0.575
POS349_254	G_inflata	4	Y	NA	100	700	400	150	NA	0.541
POS349_254	G_inflata	4	Y	NA	100	700	400	150	NA	0.654
POS349_254	G_inflata	8	M	NA	0	100	50	150	NA	0.468
POS349_254	G_scitula	15	Y	NA	100	200	150	150	NA	0.19525
POS349_254	G_scitula	15	Y	NA	100	200	150	150	NA	0.01925
POS349_254	G_scitula	15	Y	NA	100	200	150	150	NA	0.213
POS349_254	G_scitula	15	Y	NA	200	300	250	150	NA	0.41
POS349_254	G_scitula	20	Y	NA	100	700	400	150	NA	0.19
POS349_254	G_scitula	20	Y	NA	100	700	400	150	NA	0.096
POS349_254	G_scitula	20	Y	NA	100	700	400	150	NA	0.064
POS349_254	G_scitula	15	M	NA	200	300	250	150	NA	0.504
POS349_254	G_scitula	13	M	NA	300	500	400	150	NA	0.248
POS349_254	G_scitula	14	M	NA	300	500	400	150	NA	0.214
POS349_254	G_scitula	14	N	NA	500	700	600	150	NA	0.194
POS349_254	G_truncatulinoides	3	Y	NA	100	200	150	150	NA	0.367
POS349_254	G_truncatulinoides	3	Y	NA	100	200	150	150	NA	0.37
POS349_254	G_truncatulinoides	3	Y	NA	200	300	250	150	NA	0.619
POS349_254	G_truncatulinoides	3	Y	NA	200	300	250	150	NA	0.61035
POS349_254	G_truncatulinoides	4	Y	NA	100	700	400	150	NA	0.34135
POS349_254	G_truncatulinoides	4	Y	NA	100	700	400	150	NA	0.601
POS349_254	G_truncatulinoides	4	Y	NA	100	700	400	150	NA	0.573
POS349_254	G_truncatulinoides	4	Y	NA	100	700	400	150	NA	0.583
POS349_254	G_truncatulinoides	4	N	NA	500	700	600	150	NA	0.797
POS349_256	G_hirsuta	4	Y	NA	100	200	150	150	NA	0.544
POS349_256	G_hirsuta	4	Y	NA	100	200	150	150	NA	0.693
POS349_256	G_hirsuta	4	Y	NA	200	300	250	150	NA	0.655
POS349_256	G_hirsuta	4	Y	NA	200	300	250	150	NA	0.499
POS349_256	G_hirsuta	4	Y	NA	300	500	400	150	NA	0.74
POS349_256	G_hirsuta	4	Y	NA	300	500	400	150	NA	0.544
POS349_256	G_hirsuta	4	Y	NA	500	700	600	150	NA	0.731
POS349_256	G_hirsuta	4	Y	NA	500	700	600	150	NA	0.744
POS349_256	G_hirsuta	4	Y	NA	500	700	600	150	NA	0.73254
POS349_256	G_hirsuta		Y	NA	100	700	400	150	NA	0.77027
POS349_256	G_inflata		Y	NA	100	200	150	150	NA	0.855
POS349_256	G_inflata		Y	NA	100	200	150	150	NA	0.698
POS349_256	G_inflata		Y	NA	200	300	250	150	NA	0.556
POS349_256	G_inflata		Y	NA	200	300	250	150	NA	0.553
POS349_256	G_inflata		Y	NA	300	500	400	150	NA	0.442
POS349_256	G_inflata		Y	NA	300	500	400	150	NA	0.57
POS349_256	G_inflata		Y	NA	0	100	50	150	NA	0.325
POS349_256	G_inflata		Y	NA	100	700	400	150	NA	0.674
POS349_256	G_inflata		Y	NA	100	700	400	150	NA	0.702
POS349_256	G_inflata		Y	NA	100	700	400	150	NA	0.691
POS349_256	G_inflata		M	NA	500	700	600	150	NA	0.747
POS349_256	G_truncatulinoides		Y	NA	100	200	150	150	NA	0.688
POS349_256	G_truncatulinoides		Y	NA	100	200	150	150	NA	0.68495
POS349_256	G_truncatulinoides		Y	NA	200	300	250	150	NA	0.652
POS349_256	G_truncatulinoides		Y	NA	100	700	400	150	NA	0.643
POS349_256	G_truncatulinoides		N	NA	500	700	600	150	NA	1.021
POS349_256	G_truncatulinoides		N	NA	100	700	400	150	NA	1.106
POS349_258	G_hirsuta	4	Y	NA	300	500	400	150	NA	0.909
POS349_258	G_hirsuta	3	Y	NA	500	700	600	150	NA	1.13645
POS349_258	G_hirsuta	3	Y	NA	500	700	600	150	NA	1.225
POS349_258	G_hirsuta		Y	NA	100	700	400	150	NA	1.28926
POS349_258	G_hirsuta		Y	NA	100	700	400	150	NA	1.12838
POS349_258	G_inflata		M	NA	100	700	400	150	NA	0.91
POS349_258	G_inflata		M	NA	100	700	400	150	NA	0.814
POS349_258	G_scitula		Y	NA	100	700	400	150	NA	0.473
POS349_258	G_scitula		Y	NA	100	700	400	150	NA	0.411
POS349_258	G_truncatulinoides		Y	NA	100	700	400	150	NA	0.957
POS349_258	G_truncatulinoides		Y	NA	100	700	400	150	NA	0.833
POS349_258	G_truncatulinoides		Y	NA	100	700	400	150	NA	0.6999
POS349_260	G_hirsuta	4	Y	NA	0	60	30	150	NA	0.424
POS349_260	G_hirsuta	4	Y	NA	60	80	70	150	NA	0.3678
POS349_260	G_hirsuta	4	Y	NA	100	200	150	150	NA	0.77
POS349_260	G_hirsuta	4	Y	NA	100	200	150	150	NA	0.788
POS349_260	G_hirsuta	4	Y	NA	100	200	150	150	NA	0.684
POS349_260	G_hirsuta	4	Y	NA	300	500	400	150	NA	0.985
POS349_260	G_hirsuta	4	Y	NA	300	500	400	150	NA	1.012
POS349_260	G_hirsuta	4	Y	NA	300	500	400	150	NA	1.091
POS349_260	G_hirsuta	4	Y	NA	500	700	600	150	NA	0.787
POS349_260	G_hirsuta	4	Y	NA	500	700	600	150	NA	0.824
POS349_260	G_hirsuta	4	Y	NA	500	700	600	150	NA	0.595
POS349_260	G_hirsuta	4	Y	NA	500	700	600	150	NA	0.879
POS349_260	G_hirsuta	4	Y	NA	500	700	600	150	NA	0.967
POS349_260	G_hirsuta	3	Y	NA	100	700	400	150	NA	1.079
POS349_260	G_hirsuta	3	Y	NA	100	700	400	150	NA	1.03
POS349_260	G_hirsuta	3	Y	NA	100	700	400	150	NA	1.05
POS349_260	G_inflata	3	Y	NA	40	60	50	150	NA	0.831
POS349_260	G_inflata	3	Y	NA	60	80	70	150	NA	0.688
POS349_260	G_inflata	3	Y	NA	80	100	90	150	NA	0.776
POS349_260	G_inflata	4	Y	NA	100	700	400	150	NA	0.774
POS349_260	G_inflata	3	M	NA	500	700	600	150	NA	0.809
POS349_260	G_inflata	4	M	NA	100	700	400	150	NA	0.822
POS349_260	G_scitula	15	M	NA	300	500	400	150	NA	0.629
POS349_260	G_scitula	18	Y	NA	20	60	40	150	NA	0.501
POS349_260	G_scitula	15	Y	NA	100	200	150	150	NA	0.358
POS349_260	G_scitula	15	Y	NA	100	200	150	150	NA	0.607
POS349_260	G_scitula	12	Y	NA	200	300	250	150	NA	0.5654
POS349_260	G_scitula	15	Y	NA	500	700	600	150	NA	0.547
POS349_260	G_scitula	15	Y	NA	500	700	600	150	NA	0.659
POS349_260	G_scitula	15	Y	NA	500	700	600	150	NA	0.57
POS349_260	G_scitula		Y	NA	500	700	600	150	NA	0.754
POS349_260	G_scitula	15	Y	NA	100	700	400	150	NA	0.675
POS349_260	G_scitula	15	Y	NA	100	700	400	150	NA	0.662
POS349_260	G_scitula	15	Y	NA	100	700	400	150	NA	0.684
POS349_260	G_truncatulinoides	3	Y	NA	60	100	80	150	NA	0.709
POS349_260	G_truncatulinoides	3	Y	NA	100	200	150	150	NA	0.893
POS349_260	G_truncatulinoides	3	Y	NA	100	700	400	150	NA	1.19812
POS349_260	G_truncatulinoides	3	Y	NA	100	700	400	150	NA	1.36331
POS349_260	G_truncatulinoides	4	M	NA	500	700	600	150	NA	1.20067
POS349_260	G_truncatulinoides	3	M	NA	100	700	400	150	NA	1.356
POS349_260	G_truncatulinoides	3	M	NA	100	700	400	150	NA	1.275
POS349_260	G_truncatulinoides	3	N	NA	500	700	600	150	NA	1.12335
POS349_260	G_truncatulinoides	3	N	NA	500	700	600	150	NA	1.036
POS349_263	G_hirsuta	5	Y	NA	0	100	50	150	NA	0.235
POS349_263	G_hirsuta	5	Y	NA	100	200	150	150	NA	0.622
POS349_263	G_hirsuta	5	Y	NA	100	200	150	150	NA	0.632
POS349_263	G_hirsuta	5	Y	NA	100	200	150	150	NA	0.644
POS349_263	G_hirsuta	5	Y	NA	100	200	150	150	NA	0.778
POS349_263	G_hirsuta	5	Y	NA	200	300	250	150	NA	0.843
POS349_263	G_hirsuta	5	Y	NA	200	300	250	150	NA	0.612
POS349_263	G_hirsuta	4	Y	NA	300	500	400	150	NA	0.633
POS349_263	G_scitula	16	Y	NA	100	200	150	150	NA	0.593
POS349_263	G_truncatulinoides	3	Y	NA	100	200	150	150	NA	0.598
POS349_263	G_truncatulinoides	3	Y	NA	200	300	250	150	NA	0.736
POS349_263	G_truncatulinoides	3	Y	NA	500	700	600	150	NA	1.073
POS349_267	G_hirsuta	3	Y	NA	300	500	400	150	NA	0.831
POS349_267	G_hirsuta	3	Y	NA	300	500	400	150	NA	0.90065
POS349_267	G_hirsuta	4	Y	NA	100	700	400	150	NA	0.734
POS349_267	G_hirsuta	4	Y	NA	100	700	400	150	NA	0.791
POS349_267	G_hirsuta	4	Y	NA	100	700	400	150	NA	0.875
POS349_267	G_hirsuta	4	Y	NA	100	700	400	150	NA	0.685
POS349_267	G_hirsuta	4	Y	NA	100	700	400	150	NA	0.7385
POS349_267	G_hirsuta	4	Y	NA	100	700	400	150	NA	0.8796
POS349_267	G_scitula	20	Y	NA	100	700	400	150	NA	0.363
POS349_267	G_scitula	20	Y	NA	100	700	400	150	NA	0.429
POS349_267	G_truncatulinoides	3	Y	NA	100	200	150	150	NA	0.696
POS349_267	G_truncatulinoides	4	Y	NA	100	700	400	150	NA	0.77
POS349_267	G_truncatulinoides	4	Y	NA	100	700	400	150	NA	0.931
								NA= Not available
								Y= Yes
								N= No
								M= Mixed
